# Supplementary material for: Modeling anaerobic soil organic carbon decomposition in Arctic polygon tundra: insights into soil geochemical influences on carbon mineralization
Source: Copernicus journal article supplement (doi:10.5194/bg-2018-63), 2018-02-20
Supplement: Supplementary file 1 [file bg-2018-63-supplement.pdf]

## Supplementary material for

# Modeling anaerobic soil organic carbon decomposition in Arctic polygon tundra: insights into soil geochemical influences on carbon mineralization

Jianqiu Zheng<sup>1</sup>, Peter E. Thornton<sup>2,3</sup>, Scott L. Painter<sup>2,3</sup>, Baohua Gu<sup>2</sup>, Stan D. Wullschleger<sup>2,3</sup>, David E. Graham<sup>1,3</sup>

<sup>1</sup>Biosciences Division, Oak Ridge National Laboratory, Oak Ridge TN, 37931 USA

<sup>2</sup>Environmental Sciences Division, Oak Ridge National Laboratory, Oak Ridge TN, 37931 USA

<sup>3</sup>Climate Change Science Institute, Oak Ridge National Laboratory, Oak Ridge TN, 37931 USA

*Correspondence to:* David E. Graham ([grahamde@ornl.gov](mailto:grahamde@ornl.gov))

**Table S1 Summary of soil microcosm studies and physicochemical characteristics**

| Core Sample ID | Type       | Soil Layer   | Depth     | Incubation | Water content            |     | SOC<br>(C wt %) | Treatment<br>ID |
|----------------|------------|--------------|-----------|------------|--------------------------|-----|-----------------|-----------------|
|                |            |              |           |            | (g g <sup>-1</sup> dwt.) | pH  |                 |                 |
| NGADG0017      | LCP-Center | Organic      | 0-21.5 cm | Anoxic     | 9.62                     | 5.0 | 38.5            | LCP-C1-O        |
|                |            | Mineral      | 22-54 cm  | Anoxic     | 0.64                     | 4.8 | 14.7            | LCP-C1-M        |
| NGADG0073      | LCP-Center | Mineral      | 15-40 cm  | Anoxic     | 1.06                     | 5.9 | 17.58           | LCP-C2-M        |
|                |            | Permafrost   | 55-82 cm  | Anoxic     | 0.43                     | 7.1 | 1.97            | LCP-C2-P        |
| NGADG0005      | LCP-Ridge  | Organic      | 0-8 cm    | Anoxic     | 3.67                     | 5.2 | 38.9            | LCP-R-O         |
|                |            | Mineral      | 8-42 cm   | Anoxic     | 0.74                     | 4.5 | 14.7            | LCP-R-M         |
| NGADG0009      | LCP-Trough | Organic      | 0-19 cm   | Anoxic     | 2.48                     | 5.2 | 20.6            | LCP-T-O         |
|                |            | Mineral      | 25-69 cm  | Anoxic     | 0.79                     | 5.0 | 8.1             | LCP-T-M         |
| NGADG0003      | FCP-Center | Organic      | 8-28 cm   | Oxic       | 0.44                     | 4.2 | 18.6            | FCP-C-O         |
|                |            | Transitional | 38-48 cm  | Anoxic     | 2.48                     | 4.9 | 5.8             | FCP-C-T         |
|                |            | Permafrost   | 48-68 cm  | Anoxic     | 3.95                     | 5.0 | 30.8            | FCP-C-P         |
| NGADG0043      | HCP-Center | Organic      | 10-20 cm  | Oxic       | 0.44                     | 3.8 | 20.5            | HCP-C1-O        |
|                |            | Mineral      | 20-50 cm  | Anoxic     | 0.93                     | 4.5 | 17.1            | HCP-C1-M        |
| NGADG0001      | HCP-Center | Organic      | 10-30 cm  | Oxic       | 0.67                     | 4.7 | 20.5            | HCP-C2-O        |
|                |            | Permafrost   | 50-70 cm  | Anoxic     | 4.43                     | 5.7 | 17.1            | HCP-C2-P        |
| NGADG0048      | HCP-Trough | Organic      | 10-30 cm  | Anoxic     | 2.20                     | 5.1 | 31.0            | HCP-T-O         |
|                |            | Mineral      | 30-50 cm  | Anoxic     | 1.38                     | 5.3 | 17.3            | HCP-T-M         |

**Table S2 Initial conditions used for model simulation**

| Treatment ID | SOC (mol) | TOTW (mL) | TOAC (mM) | pH   | Fe(II) (mM) | $f_{doc}$ | Me_biomass (mol C) | Fe_biomass (mol C) |
|--------------|-----------|-----------|-----------|------|-------------|-----------|--------------------|--------------------|
| LCP-C1-O     | 0.05      | 13.6      | 6.37      | 5.0  | 0.79        | 0.02      | 8e-5               | 2e-5               |
| LCP-C1-M     | 0.11      | 5.9       | 2.78      | 4.8  | 22.23       | 0.01      | 4e-6               | 1e-5               |
| LCP-C2-M     | 0.15      | 5.2       | 0.47      | 5.9  | 2.7         | 0.01      | 4e-6               | 5e-7               |
| LCP-C2-P     | 0.02      | 2.8       | 4.05      | 7.1  | 5.0         | 0.02      | 5e-8               | 2e-7               |
| LCP-R-O      | 0.10      | 11.8      | 0.06      | 5.2  | 1.62        | 0.02      | 5e-6               | 1e-5               |
| LCP-R-M      | 0.11      | 6.4       | 2.67      | 4.5  | 22.97       | 0.01      | 2e-5               | 2e-5               |
| LCP-T-O      | 0.07      | 10.7      | 1.03      | 5.2  | 15.67       | 0.02      | 1e-5               | 5e-6               |
| LCP-T-M      | 0.06      | 6.6       | 1.84      | 5.0  | 7.18        | 0.01      | 8e-6               | 1e-5               |
| FCP-C-T      | 0.02      | 7.1       | 2.15      | 4.9  | 20.24       | 0.02      | 1e-6               | 1e-5               |
| FCP-C-P      | 0.08      | 8.0       | 10.76     | 5.0  | 17.45       | 0.02      | 2e-7               | 2e-6               |
| HCP-C1-M     | 0.14      | 4.8       | 12.58     | 5.92 | 113.98      | 0.01      | -                  | 1e-9               |
| HCP-C2-P     | 0.14      | 8.2       | 8.57      | 7.06 | 17.92       | 0.02      | -                  | 1e-9               |
| HCP-T-O      | 0.26      | 4.9       | 39.87     | 5.1  | 25.62       | 0.01      | 5e-7               | 1e-6               |
| HCP-T-M      | 0.14      | 5.8       | 2.84      | 5.3  | 20.92       | 0.01      | 2e-6               | 1e-8               |

**Table S3 Estimated fermentation rate at 25°C**

| Treatment ID | $f_{fer}$ (day <sup>-1</sup> ) |
|--------------|--------------------------------|
| LCP-C1-O     | 1.73E-01                       |
| LCP-R-O      | 1.73E-02                       |
| LCP-T-O      | 1.73E-02                       |
| HCP-T-O      | 1.73E-02                       |
| LCP-C1-M     | 1.73E-03                       |
| LCP-R-M      | 1.73E-03                       |
| LCP-T-M      | 3.46E-03                       |
| FCP-C-T      | 3.46E-03                       |
| LCP-C2-M     | 4.32E-05                       |
| HCP-CM       | 4.32E-06                       |
| HCP-T-M      | 8.64E-07                       |
| FCP-C-P      | 8.64E-05                       |
| LCP-C2-P     | 8.64E-05                       |
| HCP-C2-P     | 1.73E-07                       |

**Table S4 Descriptive statistics and correlation matrix for soil attributes, labile carbon pool and estimated 60 days maximal production of CO<sub>2</sub> and CH<sub>4</sub> (gas production calculated as per gram dry soil) at +8 and -2 °C.**

|                           | 1                 | 2                 | 3                 | 4                 | 5                  | 6     | 7     | 8a/8b             |
|---------------------------|-------------------|-------------------|-------------------|-------------------|--------------------|-------|-------|-------------------|
| 1. SOC                    |                   |                   |                   |                   |                    |       |       |                   |
| 2. WEOC                   | 0.80 <sup>a</sup> |                   |                   |                   |                    |       |       |                   |
| 3. TOAC                   | 0.62              | 0.69 <sup>a</sup> |                   |                   |                    |       |       |                   |
| 4. Moisture               | 0.69 <sup>a</sup> | 0.82 <sup>a</sup> | 0.78 <sup>a</sup> |                   |                    |       |       |                   |
| 5. pH                     | -0.30             | -0.15             | -0.14             | -0.11             |                    |       |       |                   |
| 6. C/N ratio              | 0.07              | 0.06              | 0.17              | 0.05              | -0.64 <sup>b</sup> |       |       |                   |
| 7. Fe(II)                 | 0.06              | 0.09              | 0.15              | 0.04              | -0.35              | -0.03 |       |                   |
| 8a. Max_8_CO <sub>2</sub> | 0.75 <sup>a</sup> | 0.72 <sup>a</sup> | 0.55 <sup>b</sup> | 0.81 <sup>a</sup> | -0.15              | -0.03 | -0.28 |                   |
| 8b. Max_2_CO <sub>2</sub> | 0.66 <sup>a</sup> | 0.73 <sup>a</sup> | 0.77 <sup>a</sup> | 0.90 <sup>a</sup> | -0.12              | 0.11  | -0.24 |                   |
| 9a. Max_8_CH <sub>4</sub> | 0.54 <sup>b</sup> | 0.63 <sup>b</sup> | 0.67 <sup>a</sup> | 0.85 <sup>a</sup> | -0.13              | 0.19  | -0.29 | 0.90 <sup>a</sup> |
| 9b. Max_2_CH <sub>4</sub> | 0.47              | 0.61 <sup>b</sup> | 0.75 <sup>a</sup> | 0.84 <sup>a</sup> | -0.09              | 0.22  | -0.23 | 0.96 <sup>a</sup> |

Note: <sup>a</sup> correlation is significant at the 0.01 level (two-tailed); <sup>b</sup> correlation is significant at the 0.05 level (two-tailed)

**Table S5 ANOVA for effect of temperature and soil depth on initial production rate of CO<sub>2</sub> and CH<sub>4</sub>**

|                 |             | <i>F</i> | <i>p</i> |
|-----------------|-------------|----------|----------|
| CO <sub>2</sub> | Temperature | 3.83     | 0.02     |
|                 | Soil depth  | 25.93    | <0.001   |
|                 | Interaction | 3.90     | 0.005    |
| CH <sub>4</sub> | Temperature | 3.26     | 0.04     |
|                 | Soil depth  | 7.70     | <0.001   |
|                 | Interaction | 2.29     | 0.07     |

**Table S6 Temperature effects on initial production rates of CO<sub>2</sub> and CH<sub>4</sub> (*t*-test with unequal variances)**

|                 |                        | <i>t</i> | <i>p</i> |
|-----------------|------------------------|----------|----------|
| CO <sub>2</sub> | Organic vs. Mineral    | 2.36     | 0.85     |
|                 | Organic vs. Permafrost | 3.18     | <0.01    |
|                 | Mineral vs. Permafrost | 2.31     | <0.01    |
| CH <sub>4</sub> | Organic vs. Mineral    | 4.30     | 0.13     |
|                 | Organic vs. Permafrost | 4.30     | 0.09     |
|                 | Mineral vs. Permafrost | 2.78     | 0.12     |

5

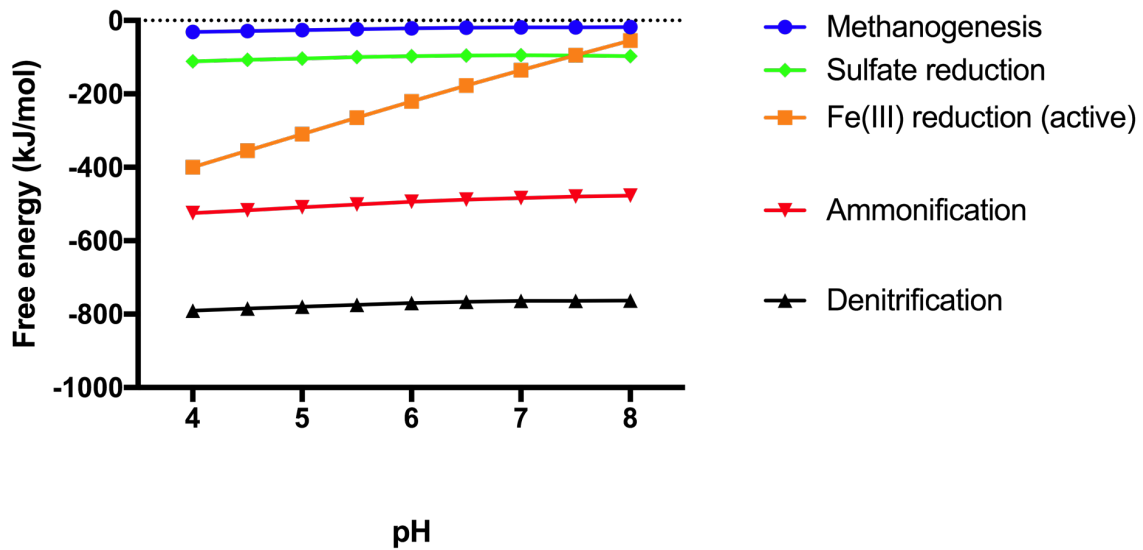

Figure S1 The Gibbs free energy of anaerobic microbial processes increases with pH. Calculated from standard free energies of reaction for acetate oxidation coupled to the indicated reduction processes (Hanselmann, 1991). Substrate and product concentrations were estimated from BEO polygon soil samples assuming 298 K temperature, 200  $\mu\text{M}$  total dissolved  $\text{CO}_2$  species, 1 mM  $\text{Fe}(\text{OH})_3$  equiv., 14 mM  $\text{Fe}(\text{II})$ , 374  $\mu\text{M}$  acetate, 5.7  $\mu\text{M}$  dissolved  $\text{CH}_4$ , 160 nM  $\text{NO}_3^-$ , 28  $\mu\text{M}$   $\text{NH}_4^+$ , and 75  $\mu\text{M}$   $\text{SO}_4^{2-}$ .



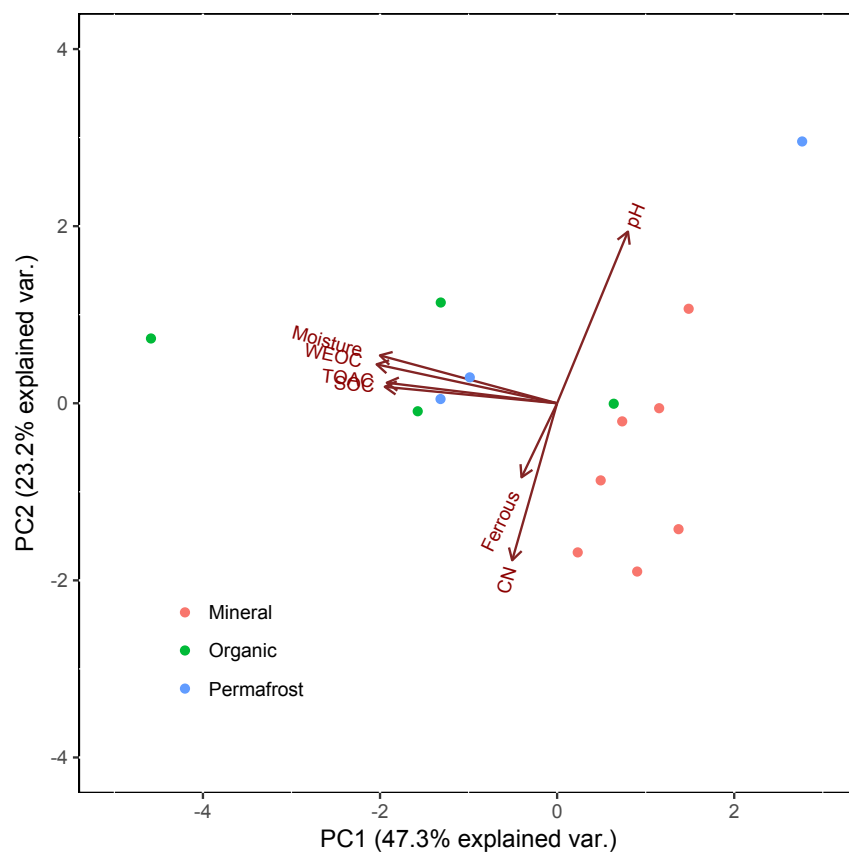

Figure S2 Multivariate analysis on soil geochemical characteristics among distinct soil depths

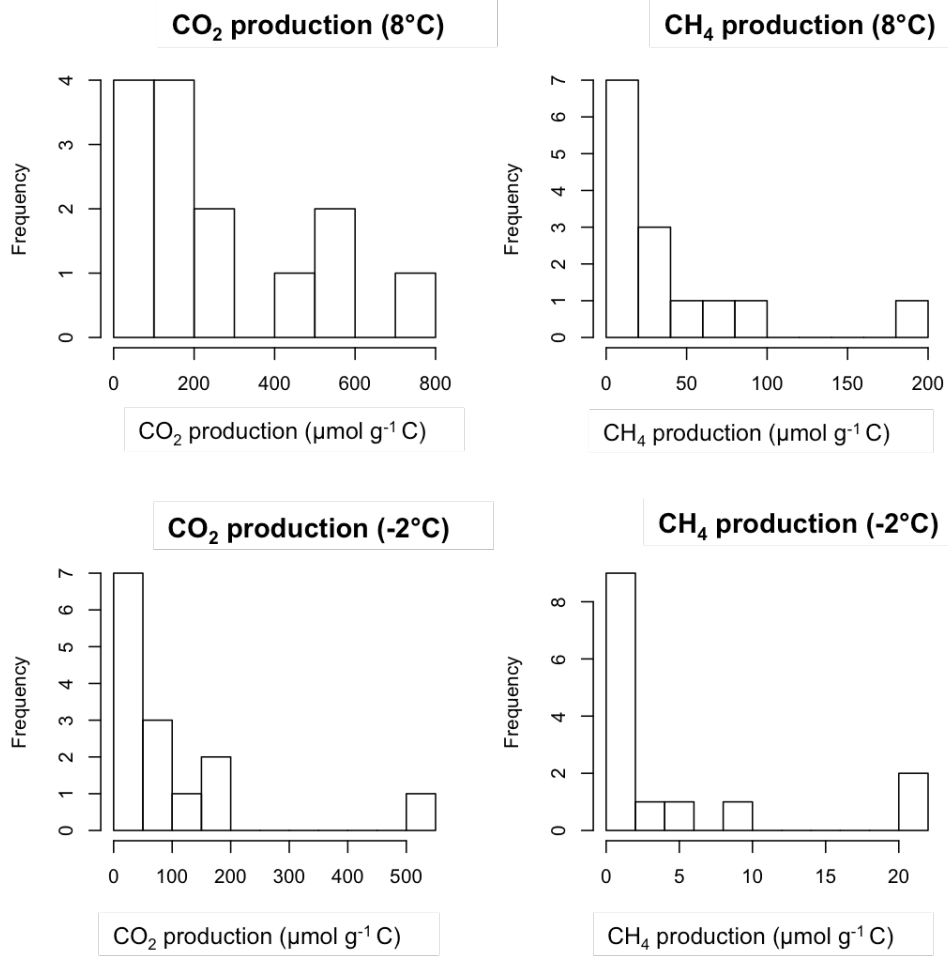

**Figure S3 Data distribution of maximum CO<sub>2</sub> and CH<sub>4</sub> production among different treatments.**

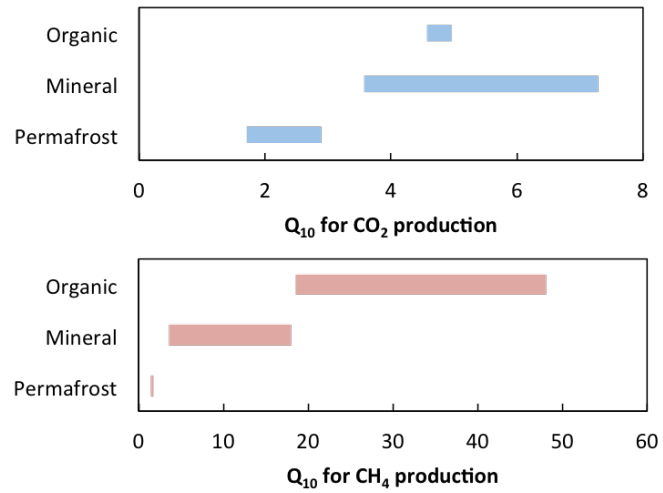

**Figure S4 Temperature sensitivity of CO<sub>2</sub> and CH<sub>4</sub> production. CO<sub>2</sub> production rate at 4 and 8 °C were both normalized to CO<sub>2</sub> production rate at -2°C for each soil microtopographic feature and soil layer combination.**

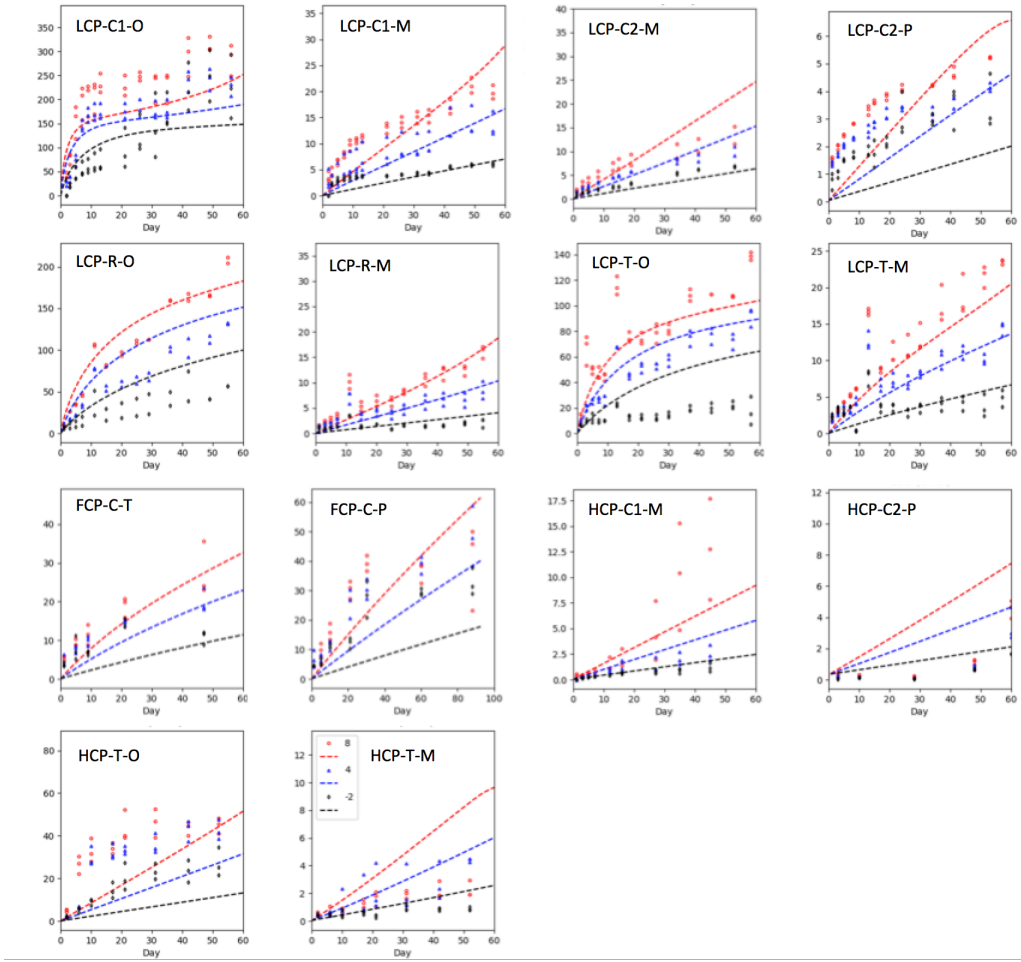

**Figure S5 Comparison of observed and modeled CO<sub>2</sub> production from organic, mineral (transitional) and permafrost layers of different microtopographic features of LCP, FCP and HCP.**

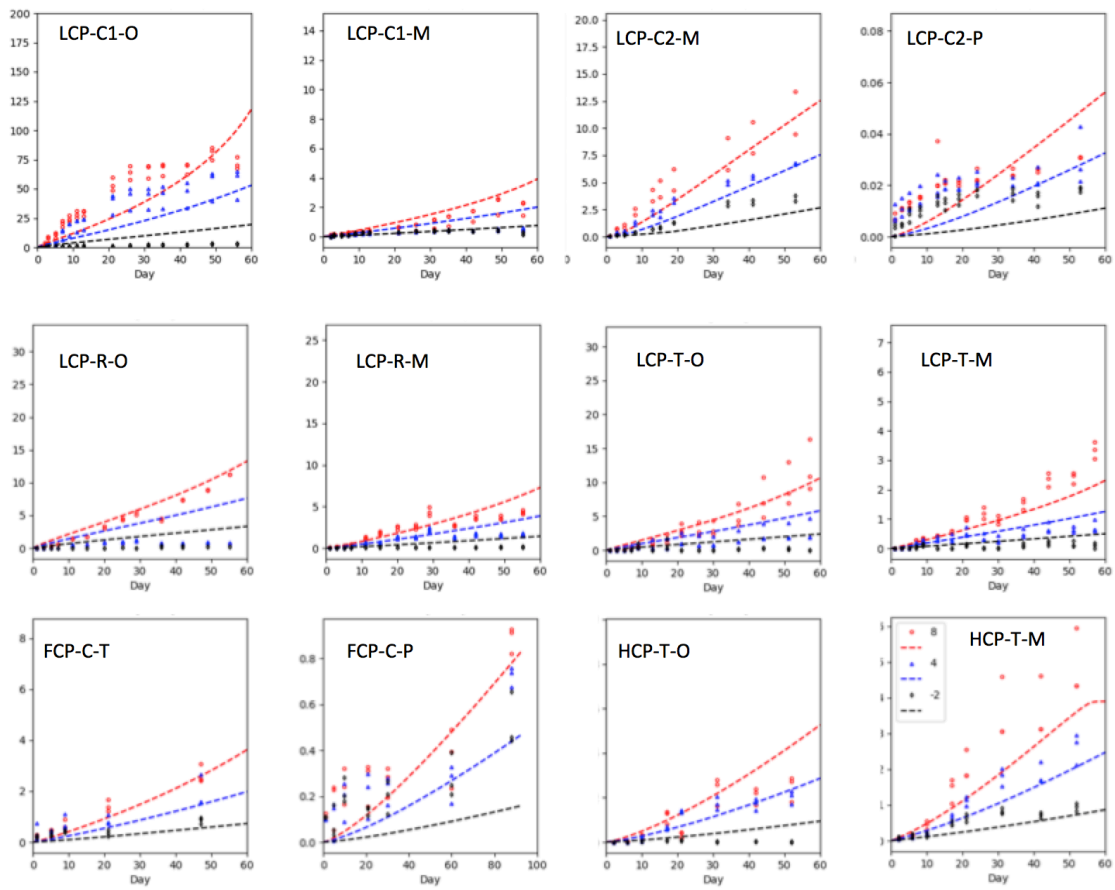

**Figure S6 Comparison of observed and modeled CH<sub>4</sub> production from organic, mineral (transitional) and permafrost layers of different microtopographic features of LCP, FCP and HCP.**

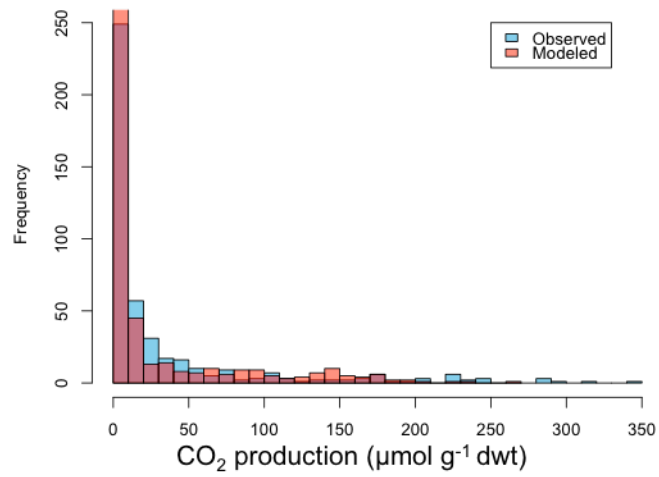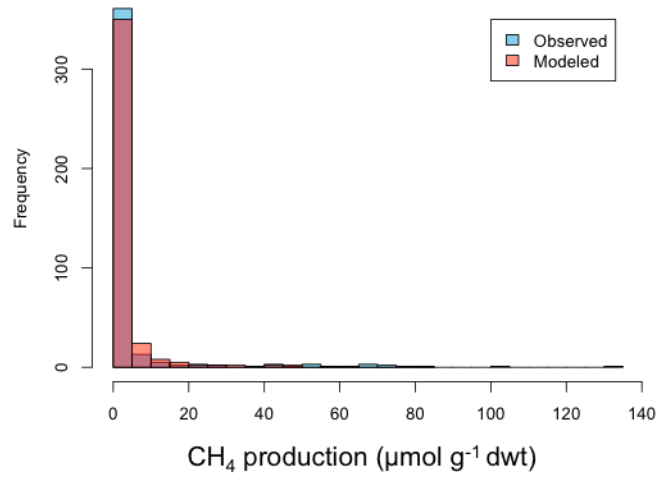

**Figure S7 Comparison of data distribution between modeled and observed values for both CO<sub>2</sub> (upper) and CH<sub>4</sub> (lower) production.**

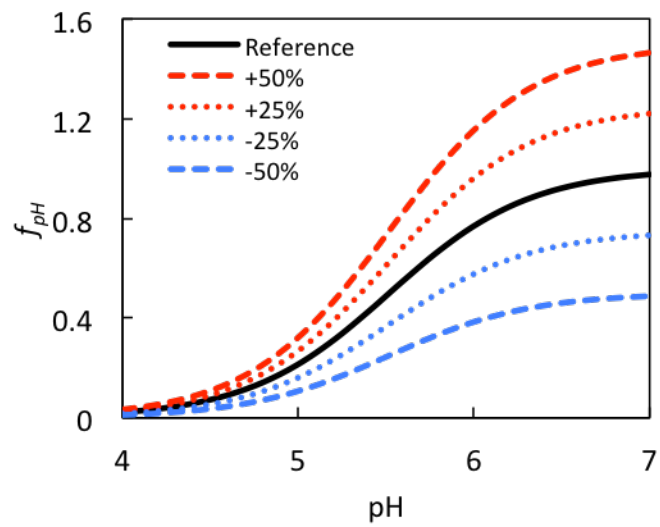

Figure S8. pH response functions used in sensitivity analysis. Perturbations of  $\pm 25\%$  and  $\pm 50\%$  perturbations to the final value of  $f_{pH}$ .

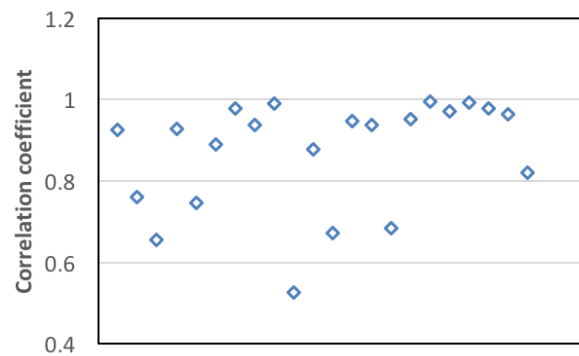

**Figure S9** Correlations between Fe(II) concentration increase and pH increase during anaerobic incubations of LCP and FCP samples.
